# Supplementary material for: A series of dinuclear cuprous iodide complexes chelated with 1,2-bis(diphenylphosphino)benzene derivatives: structural, photophysical and thermal properties
Source: Royal Society of Chemistry journal article supplement (doi:10.1039/c5ce02533h), 2016-01-01
Supplement: c5ce02533h1.pdf [file c5ce02533h1.pdf]

## Supporting Information

### A series of dinuclear cuprous iodide complexes chelated with 1,2-bis(diphenylphosphino)benzene derivatives: structural, photophysical and thermal properties

Xiaoyue Li, Juanye Zhang, Feng Wei, Xiaochen Liu, Zhiwei Liu,\* Zuqiang Bian,\* and Chunhui Huang

Beijing National Laboratory for Molecular Sciences (BNLMS), State Key Laboratory of Rare Earth Materials Chemistry and Applications, College of Chemistry and Molecular Engineering, Peking University, Beijing 100871, P. R. China.

E-mails: zwliu@pku.edu.cn, bianzq@pku.edu.cn

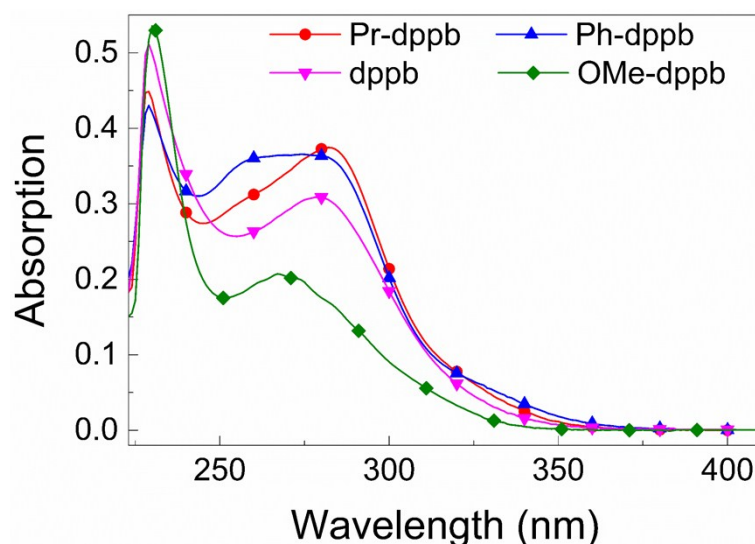

**Figure S1.** UV absorption spectra of the four bisphosphine ligands 1,2-bis(diphenylphosphino)benzene (dppb), 4-phenyl-1,2-bis(diphenylphosphino)benzene (Ph-dppb), 4-pyrrolyl-1,2-bis(diphenylphosphino)benzene (Pr-dppb), and 4,5-dimethoxyl-1,2-bis(diphenylphosphino)benzene (OMe-dppb) measured in  $\text{CH}_2\text{Cl}_2$  ( $10^{-5}$  M) at room temperature.

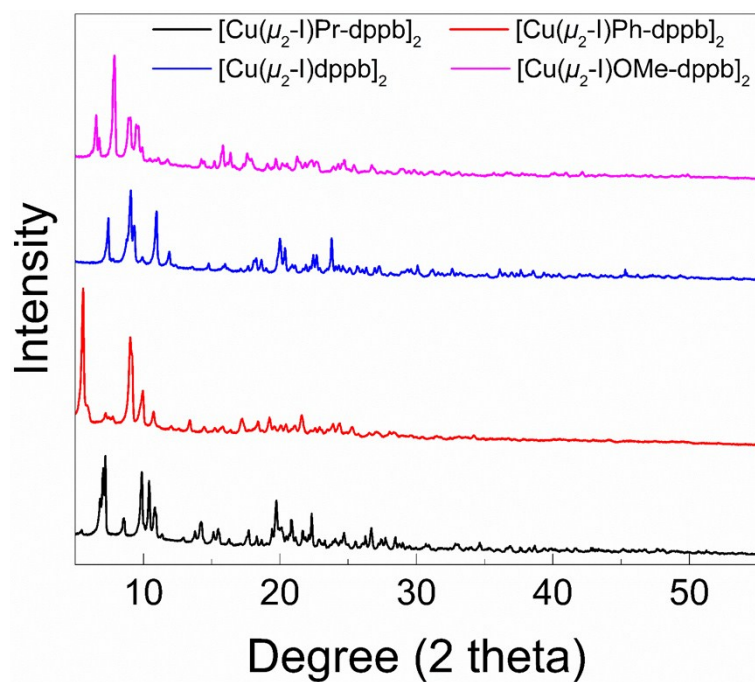

**Figure S2.** PXRD spectra of  $[\text{Cu}(\mu_2\text{-I})\text{dppb}]_2$ ,  $[\text{Cu}(\mu_2\text{-I})\text{Ph-dppb}]_2$ ,  $[\text{Cu}(\mu_2\text{-I})\text{Pr-dppb}]_2$ , and  $[\text{Cu}(\mu_2\text{-I})\text{OMe-dppb}]_2$ . The data was collected using a X'Pert<sup>3</sup> Powder X-ray diffractometer under monochromated Cu  $K\alpha$  irradiation ( $\lambda = 1.5418 \text{ \AA}$ ) at a scan rate of  $3.44^\circ\text{min}^{-1}$ .
